# Supplementary material for: Stage-Specific Sampling by Pattern Recognition Receptors during Candida albicans Phagocytosis
Source: PubMed Central journal article supplement (PMC2583056; doi:10.1371/journal.ppat.1000218), 2008-11-28

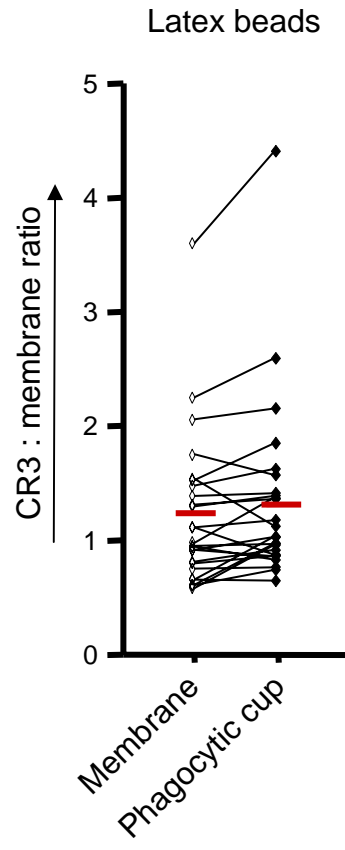

Supplement: ppat.1000218.s002.pdf [file ppat.1000218.s002.pdf]
