# Supplementary material for: Stage-Specific Sampling by Pattern Recognition Receptors during Candida albicans Phagocytosis
Source: PubMed Central journal article supplement (PMC2583056; doi:10.1371/journal.ppat.1000218), 2008-11-28

A

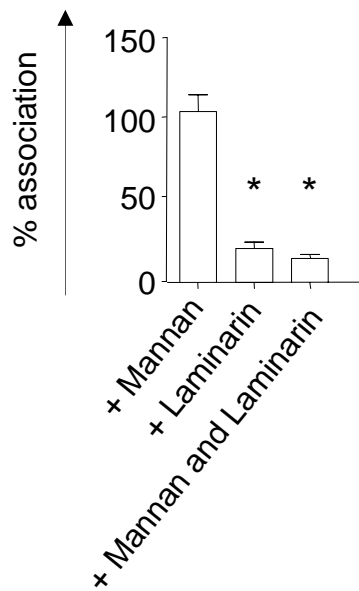

B

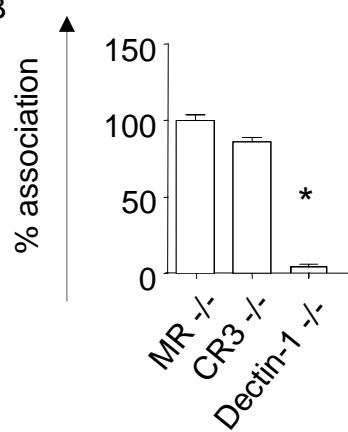

Supplement: ppat.1000218.s003.pdf [file ppat.1000218.s003.pdf]
